# Supplementary material for: Identification of two novel mutations in CDHR1 in consanguineous Spanish families with autosomal recessive retinal dystrophy
Source: PubMed Central journal article supplement (PMC4642573; doi:10.1038/srep13902), 2015-09-09

## SUPPLEMENTARY INFORMATION

### **Identification of two novel mutations in *CDHR1* in consanguineous Spanish families with autosomal recessive retinal dystrophy**

Konstantinos Nikopoulos<sup>#</sup>, Almudena Avila-Fernandez<sup>#</sup>, Marta Corton, Maria Isabel Lopez-Molina, Raquel Perez-Carro, Lara Bontadelli, Silvio Alessandro Di Gioia, Olga Zurita, Blanca Garcia-Sandoval, Carlo Rivolta<sup>#</sup>, Carmen Ayuso<sup>#\*</sup>.

# Equally contributing authors

\* Corresponding author

## SUPPLEMENTARY INFORMATION INDEX

### LEGEND TO SUPPLEMENTARY FIGURE

**Supplementary Figure S1. Visual field testing of affected individual II:2 from family RP-0763.**

**(a):** Visual field testing for both left and right eye performed at the age of 42 years showing tubular visual field with a small island of central and temporal vision. **(b):** Visual field testing for both and left eye performed at the age of 45 years showing complete scotoma.

**Supplementary Figure S1.** Visual field testing of affected individual II:2 from family RP-0763. (a): Visual field testing for both left and right eye performed at the age of 42 years showing tubular visual field with a small island of central and temporal vision. (b): Visual field testing for both and left eye performed at the age of 45 years showing complete scotoma.

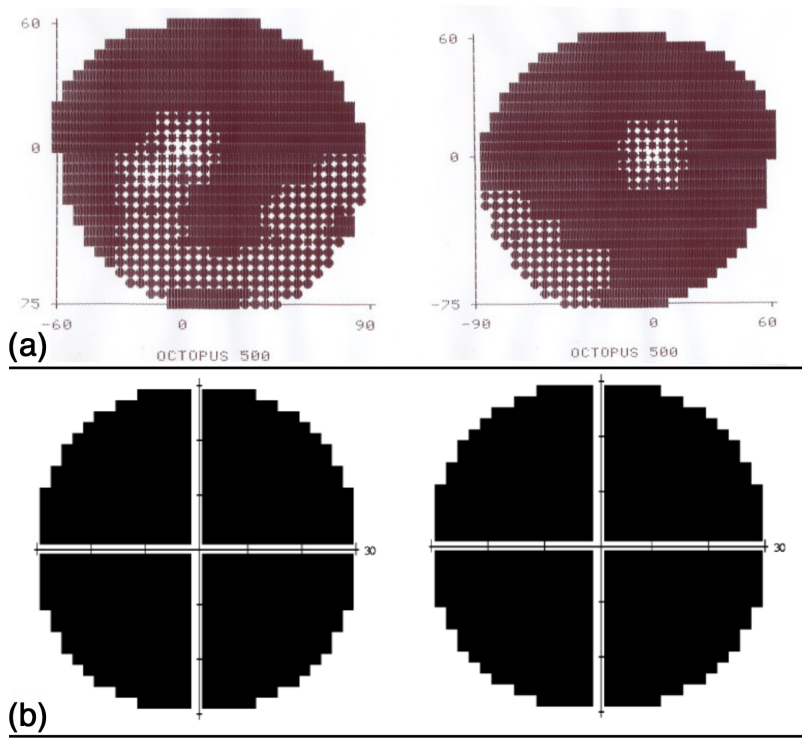

Supplement: srep13902-s1.pdf [file srep13902-s1.pdf]
